# Supplementary material for: Quantitative Evaluation of Task-Induced Neurological Outcome after Stroke
Source: MDPI journal article supplement (doi:10.3390/brainsci11070900), 2021-07-07
Supplement: s1 [file s1]

**Table S1.** Statistical analysis of the EEG spectral features for the Control group and the Stroke group during the resting, motor, and cognitive tasks. Resting state is considered as the baseline. \* indicates  $p < 0.05$ .

| EEG Features           | Scenario            | Mean Value |        | Standard Deviation   |                      | Change from Baseline (%) |        |            | p-value |
|------------------------|---------------------|------------|--------|----------------------|----------------------|--------------------------|--------|------------|---------|
|                        |                     | Control    | Stroke | Control              | Stroke               | Control                  | Stroke | Difference |         |
| Alpha (Relative Power) | Baseline (Resting)  | 0.51       | 0.47   | <a href="#">0.21</a> | <a href="#">0.22</a> | -                        | -      | -          | 0.204   |
|                        | Walking (Motor)     | 0.47       | 0.43   | <a href="#">0.20</a> | <a href="#">0.28</a> | -0.05                    | -0.13  | 0.08       | 0.001*  |
|                        | Working (Motor)     | 0.39       | 0.42   | <a href="#">0.14</a> | <a href="#">0.20</a> | -0.21                    | -0.14  | -0.07      | 0.0001* |
|                        | Reading (Cognitive) | 0.49       | 0.48   | <a href="#">0.19</a> | <a href="#">0.27</a> | -0.004                   | -0.016 | 0.012      | 0.0001* |
| Beta (Relative Power)  | Baseline (Resting)  | 0.78       | 0.74   | <a href="#">0.47</a> | <a href="#">0.47</a> | -                        | -      | -          | 0.202   |
|                        | Walking (Motor)     | 0.50       | 0.53   | <a href="#">0.38</a> | <a href="#">0.42</a> | -0.35                    | -0.31  | -0.04      | 0.055   |
|                        | Working (Motor)     | 0.52       | 0.69   | <a href="#">0.30</a> | <a href="#">0.39</a> | -0.32                    | -0.10  | -0.22      | 0.0001* |
|                        | Reading (Cognitive) | 0.74       | 0.75   | <a href="#">0.42</a> | <a href="#">0.56</a> | -0.03                    | -0.02  | -0.01      | 0.002*  |
| Theta (Relative Power) | Baseline (Resting)  | 0.77       | 0.73   | <a href="#">0.27</a> | <a href="#">0.29</a> | -                        | -      | -          | 0.608   |
|                        | Walking (Motor)     | 1.07       | 0.83   | <a href="#">0.41</a> | <a href="#">0.29</a> | 0.42                     | 0.09   | 0.33       | 0.0001* |
|                        | Working (Motor)     | 0.88       | 0.73   | <a href="#">0.35</a> | <a href="#">0.29</a> | 0.16                     | -0.04  | 0.20       | 0.003*  |
|                        | Reading (Cognitive) | 0.84       | 0.79   | <a href="#">0.15</a> | <a href="#">0.28</a> | 0.11                     | 0.04   | 0.07       | 0.022*  |
| Delta (Relative Power) | Baseline (Resting)  | 3.60       | 3.70   | <a href="#">0.90</a> | <a href="#">0.98</a> | -                        | -      | -          | 0.119   |
|                        | Walking (Motor)     | 3.74       | 3.97   | <a href="#">0.71</a> | <a href="#">0.95</a> | 0.03                     | 0.09   | -0.06      | 0.0001* |
|                        | Working (Motor)     | 3.74       | 3.56   | <a href="#">0.72</a> | <a href="#">0.99</a> | 0.03                     | -0.02  | 0.05       | 0.0001* |
|                        | Reading (Cognitive) | 3.65       | 3.64   | <a href="#">0.85</a> | <a href="#">0.97</a> | 0.002                    | 0.001  | 0.001      | 0.001*  |
| Gamma (Relative Power) | Baseline (Resting)  | 0.33       | 0.36   | <a href="#">0.33</a> | <a href="#">0.31</a> | -                        | -      | -          | 0.584   |
|                        | Walking (Motor)     | 0.22       | 0.25   | <a href="#">0.30</a> | <a href="#">0.31</a> | -0.36                    | -0.27  | -0.09      | 0.163   |
|                        | Working (Motor)     | 0.48       | 0.60   | <a href="#">0.48</a> | <a href="#">0.71</a> | 0.39                     | 0.76   | -0.37      | 0.0001* |
|                        | Reading (Cognitive) | 0.28       | 0.34   | <a href="#">0.21</a> | <a href="#">0.29</a> | -0.18                    | -0.02  | -0.16      | 0.0001* |

**Table S2.** Statistical analysis of the asymmetry of spectral components for the Control group and the Stroke group during the resting, motor and cognitive tasks. Resting state is considered as the baseline. \* indicates  $p < 0.05$ .

| EEG Features    | Scenario            | Mean Value |        | Standard Deviation    |                       | p-value |
|-----------------|---------------------|------------|--------|-----------------------|-----------------------|---------|
|                 |                     | Control    | Stroke | Control               | Stroke                |         |
| Alpha Asymmetry | Resting             | 0.13       | 0.12   | <a href="#">0.083</a> | <a href="#">0.081</a> | 0.726   |
|                 | Walking (Motor)     | 0.109      | 0.112  | <a href="#">0.07</a>  | <a href="#">0.09</a>  | 0.033*  |
|                 | Working (Motor)     | 0.09       | 0.10   | <a href="#">0.06</a>  | <a href="#">0.07</a>  | 0.03*   |
|                 | Reading (Cognitive) | 0.10       | 0.11   | <a href="#">0.04</a>  | <a href="#">0.07</a>  | 0.0001* |
| Beta Asymmetry  | Resting             | 0.19       | 0.17   | <a href="#">0.11</a>  | <a href="#">0.09</a>  | 0.014*  |
|                 | Walking (Motor)     | 0.16       | 0.15   | <a href="#">0.10</a>  | <a href="#">0.10</a>  | 0.496   |
|                 | Working (Motor)     | 0.15       | 0.09   | <a href="#">0.09</a>  | <a href="#">0.09</a>  | 0.57    |
|                 | Reading (Cognitive) | 0.17       | 0.16   | <a href="#">0.09</a>  | <a href="#">0.09</a>  | 0.460   |
| Theta Asymmetry | Resting             | 0.09       | 0.11   | <a href="#">0.05</a>  | <a href="#">0.08</a>  | 0.0001* |
|                 | Walking (Motor)     | 0.07       | 0.08   | <a href="#">0.05</a>  | <a href="#">0.07</a>  | 0.002*  |
|                 | Working (Motor)     | 0.07       | 0.08   | <a href="#">0.05</a>  | <a href="#">0.06</a>  | 0.31    |
|                 | Reading (Cognitive) | 0.08       | 0.09   | <a href="#">0.03</a>  | <a href="#">0.07</a>  | 0.0001* |
| Delta Asymmetry | Resting             | 0.08       | 0.07   | <a href="#">0.06</a>  | <a href="#">0.06</a>  | 0.738   |
|                 | Walking (Motor)     | 0.06       | 0.06   | <a href="#">0.05</a>  | <a href="#">0.06</a>  | 0.172   |
|                 | Working (Motor)     | 0.06       | 0.07   | <a href="#">0.05</a>  | <a href="#">0.05</a>  | 0.79    |
|                 | Reading (Cognitive) | 0.065      | 0.072  | <a href="#">0.05</a>  | <a href="#">0.06</a>  | 0.087   |
| Gamma Asymmetry | Resting             | 0.24       | 0.21   | <a href="#">0.13</a>  | <a href="#">0.12</a>  | 0.191   |
|                 | Walking (Motor)     | 0.21       | 0.19   | <a href="#">0.12</a>  | <a href="#">0.12</a>  | 0.266   |
|                 | Working (Motor)     | 0.20       | 0.19   | <a href="#">0.12</a>  | <a href="#">0.11</a>  | 0.76    |
|                 | Reading (Cognitive) | 0.21       | 0.20   | <a href="#">0.11</a>  | <a href="#">0.11</a>  | 0.99    |
| pdBSI           | Resting             | 0.12       | 0.11   | <a href="#">0.06</a>  | <a href="#">0.06</a>  | 0.487   |
|                 | Walking (Motor)     | 0.10       | 0.10   | <a href="#">0.06</a>  | <a href="#">0.07</a>  | 0.318   |
|                 | Working (Motor)     | 0.09       | 0.10   | <a href="#">0.05</a>  | <a href="#">0.05</a>  | 0.29    |
|                 | Reading (Cognitive) | 0.10       | 0.11   | <a href="#">0.04</a>  | <a href="#">0.07</a>  | 0.001*  |

**Table S3.** Statistical analysis of the DTR, DTABR, and DAR for the Control group and the Stroke group during the resting, motor and cognitive tasks. Resting state is considered as the baseline. \* indicates  $p < 0.05$ .

| EEG Features | Scenario            | Mean Value |        | Standard Deviation    |                       | p-value |
|--------------|---------------------|------------|--------|-----------------------|-----------------------|---------|
|              |                     | Control    | Stroke | Control               | Stroke                |         |
| DAR          | Resting             | 11.10      | 13.51  | <a href="#">10.57</a> | <a href="#">17.54</a> | 0.039*  |
|              | Walking (Motor)     | 11.14      | 14.65  | <a href="#">8.62</a>  | <a href="#">18.48</a> | 0.0001* |
|              | Working (Motor)     | 11.98      | 13.17  | <a href="#">8.30</a>  | <a href="#">13.17</a> | 0.034*  |
|              | Reading (Cognitive) | 10.62      | 12.36  | <a href="#">4.82</a>  | <a href="#">17.46</a> | 0.0001* |
| DTR          | Resting             | 5.83       | 6.72   | <a href="#">4.04</a>  | <a href="#">9.67</a>  | 0.007*  |
|              | Walking (Motor)     | 4.46       | 6.05   | <a href="#">3.12</a>  | <a href="#">6.33</a>  | 0.006*  |
|              | Working (Motor)     | 5.22       | 3.63   | <a href="#">3.63</a>  | <a href="#">4.43</a>  | 0.09    |
|              | Reading (Cognitive) | 5.13       | 5.86   | <a href="#">3.05</a>  | <a href="#">5.81</a>  | 0.0001* |
| DTABR        | Resting             | 5.69       | 6.73   | <a href="#">7.65</a>  | <a href="#">8.90</a>  | 0.138   |
|              | Walking (Motor)     | 7.33       | 8.80   | <a href="#">4.92</a>  | <a href="#">9.95</a>  | 0.0001* |
|              | Working (Motor)     | 6.78       | 5.90   | <a href="#">4.33</a>  | <a href="#">5.62</a>  | 0.03*   |
|              | Reading (Cognitive) | 5.67       | 6.50   | <a href="#">4.80</a>  | <a href="#">8.70</a>  | 0.0001* |

**Table S4.** Results of the performance of different Machine learning Models for classification of the resting and the active (walking, working, and reading) states.

| Model                 | Accuracy | Sensitivity | Specificity | Precision | Negative Predictive Value | AUC  | Gini |
|-----------------------|----------|-------------|-------------|-----------|---------------------------|------|------|
| SVM                   | 0.90     | 0.98        | 0.351       | 0.92      | 0.68                      | 0.84 | 0.69 |
| Logistic Regression   | 0.88     | 0.99        | 0.092       | 0.89      | 0.47                      | 0.74 | 0.47 |
| Neural Network        | 0.88     | 1.00        | 0.005       | 0.88      | 0.29                      | 0.74 | 0.41 |
| CHAID                 | 0.88     | 0.99        | 0.104       | 0.89      | 0.53                      | 0.77 | 0.54 |
| Discriminant Analysis | 0.70     | 0.71        | 0.671       | 0.94      | 0.24                      | 0.73 | 0.47 |

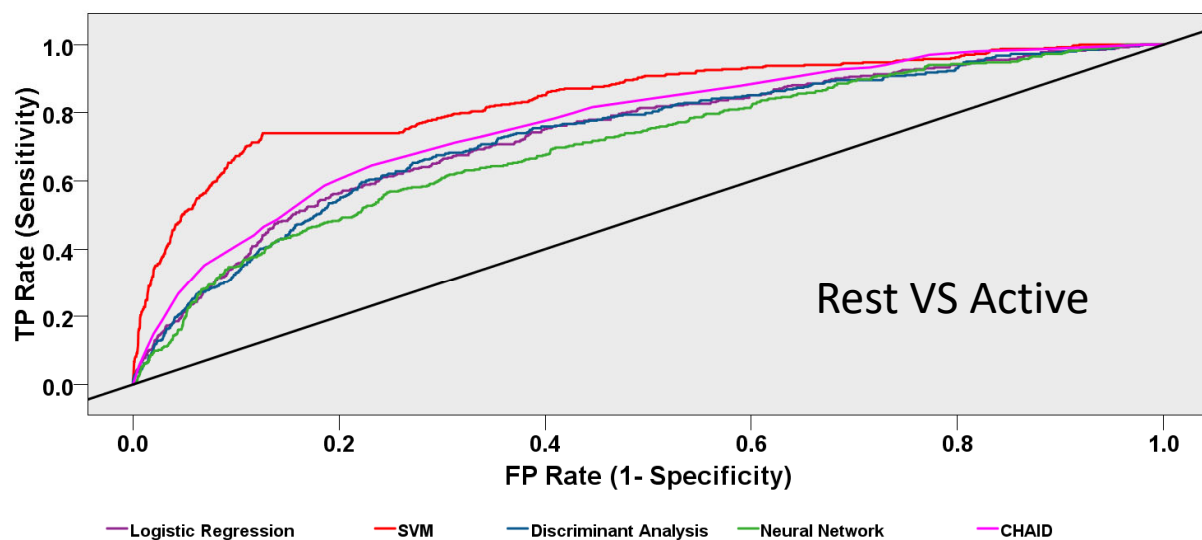

**Figure S1.** Receiver Operating Characteristic (ROC) curves of five different machine-learning models (Support Vector Machine, Logistic Regression, Discriminant analysis, Neural Network and CHAID decision tree) for classification of the resting and the active (walking, working, and reading) states. SVM classified the resting and the active dataset with the highest AUC (0.84) and highest accuracy (ACC: 90%). The diagonal black line is the reference line.

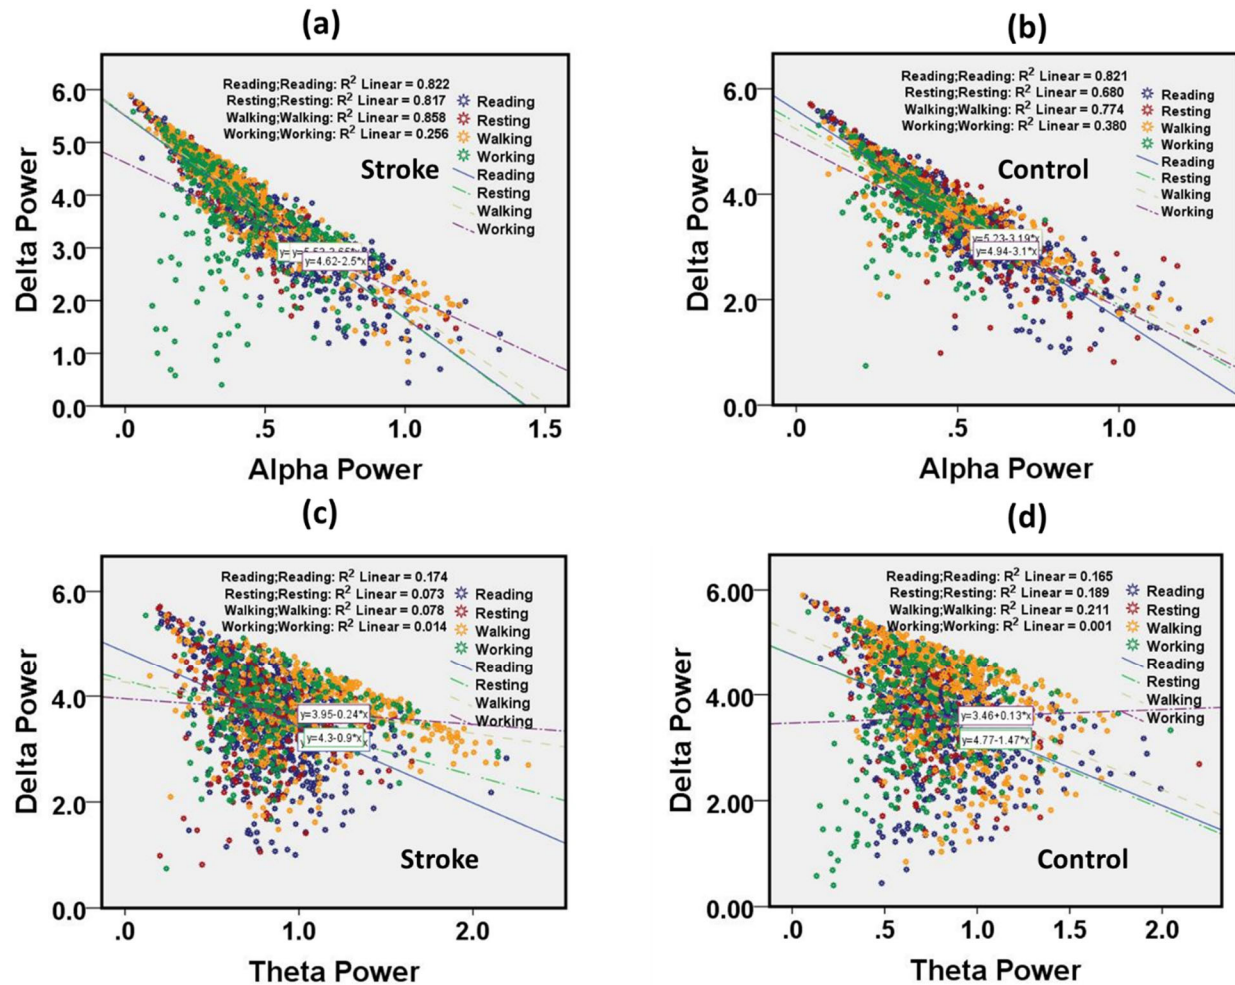

**Figure S2.** The scatterplot and the regression line of delta power with theta power and alpha power to demonstrate the correlation of delta power with theta and alpha power during varied mental workloads (Resting, Walking, Working, Reading tasks). (a) the correlation of delta power with alpha power for stroke group (b) the correlation of delta power with alpha power for control group (c) the correlation of delta power with theta power for stroke group (d) the correlation of delta power with theta power for control group.  $R^2$  or  $r^2$  (R squared) = Coefficient of determination.
